# Supplementary material
Source: PubMed Central journal article supplement (PMC3820243)
Supplement: supp_126.21.4985_JCS132837.pdf [file supp_126.21.4985_JCS132837.pdf]

## Figure S1 Fleck et al.

Figure S1

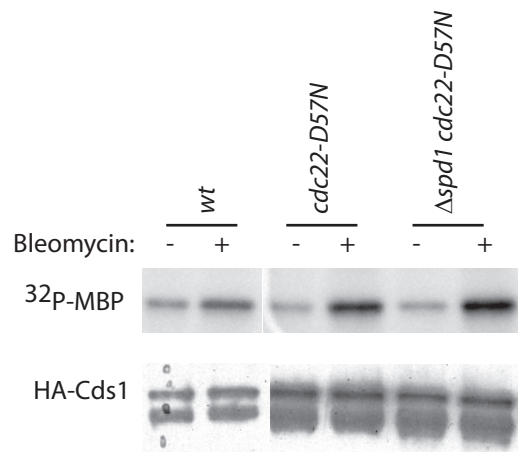

**DNA damage activates Cds1 in *cdc22-D57N* cells.** Cds1 extracted from exponentially growing cells or cells treated with bleomycin for 2 hours were assayed for ability to phosphorylate MBP.
